# Supplementary material for: Fabrication and Study of Dextran/Sulfonated Polysulfone Blend Membranes for Low-Density Lipoprotein Adsorption
Source: MDPI journal article supplement (doi:10.3390/ma16134641), 2023-06-27
Supplement: s1 [file s1]

# Fabrication and Study of dextran/sulfonated polysulfone blend membranes for low-density lipoprotein adsorption

Fei Fang <sup>1,2</sup>, Hai-Yang Zhao <sup>2</sup>, Rui Wang <sup>2</sup>, Qi Chen <sup>2</sup>, Qiong-Yan Wang <sup>2,\*</sup> and Qing-Hua Zhang <sup>1,\*</sup>

<sup>1</sup> College of Chemical and Biological Engineering, Zhejiang University, Hangzhou, China, 310027

<sup>2</sup> Research and Development Center, Zhejiang Sucon Silicone Co., Ltd., Shaoxing 312088, China;

\* Correspondence: wqy2040@163.com (Q.-Y.W.); qhzhzhang@zju.edu.cn (Q.-H.Z.)

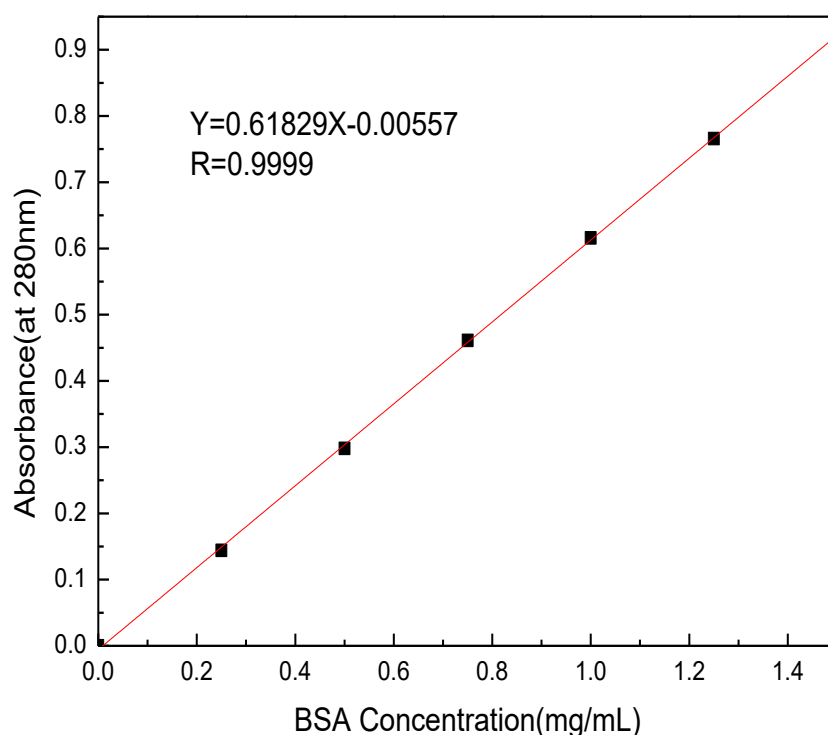

Figure S1. Standard curves of the BSA adsorption.

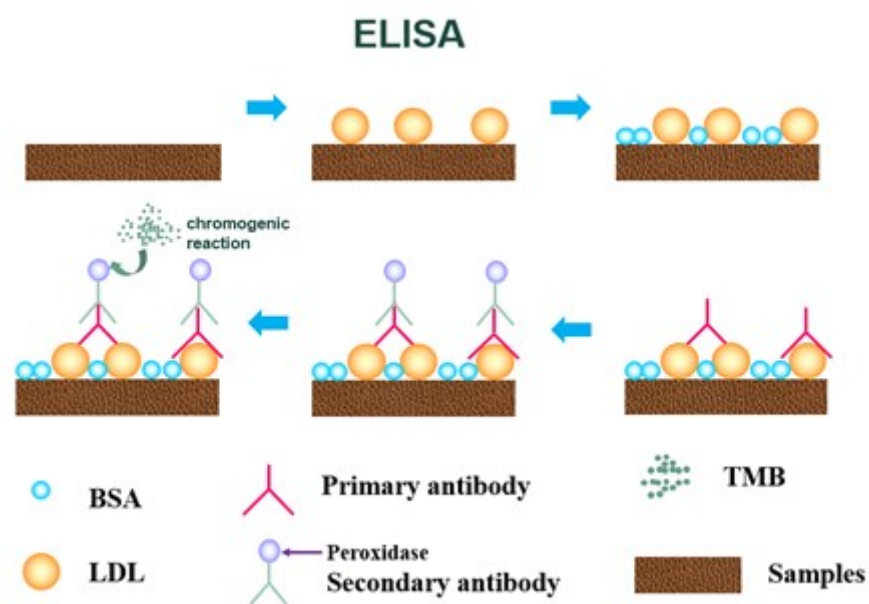

Figure S2. Standard curves of the BSA adsorption.
